# Supplementary material for: Perfluorooctanesulfonic acid modulates barrier function and systemic T-cell homeostasis during intestinal inflammation
Source: PubMed Central journal article supplement (PMC8713990; doi:10.1242/dmm.049104), 2021-12-23
Supplement: dmm-14-049104-s1.pdf [file dmm-14-049104-s1.pdf]

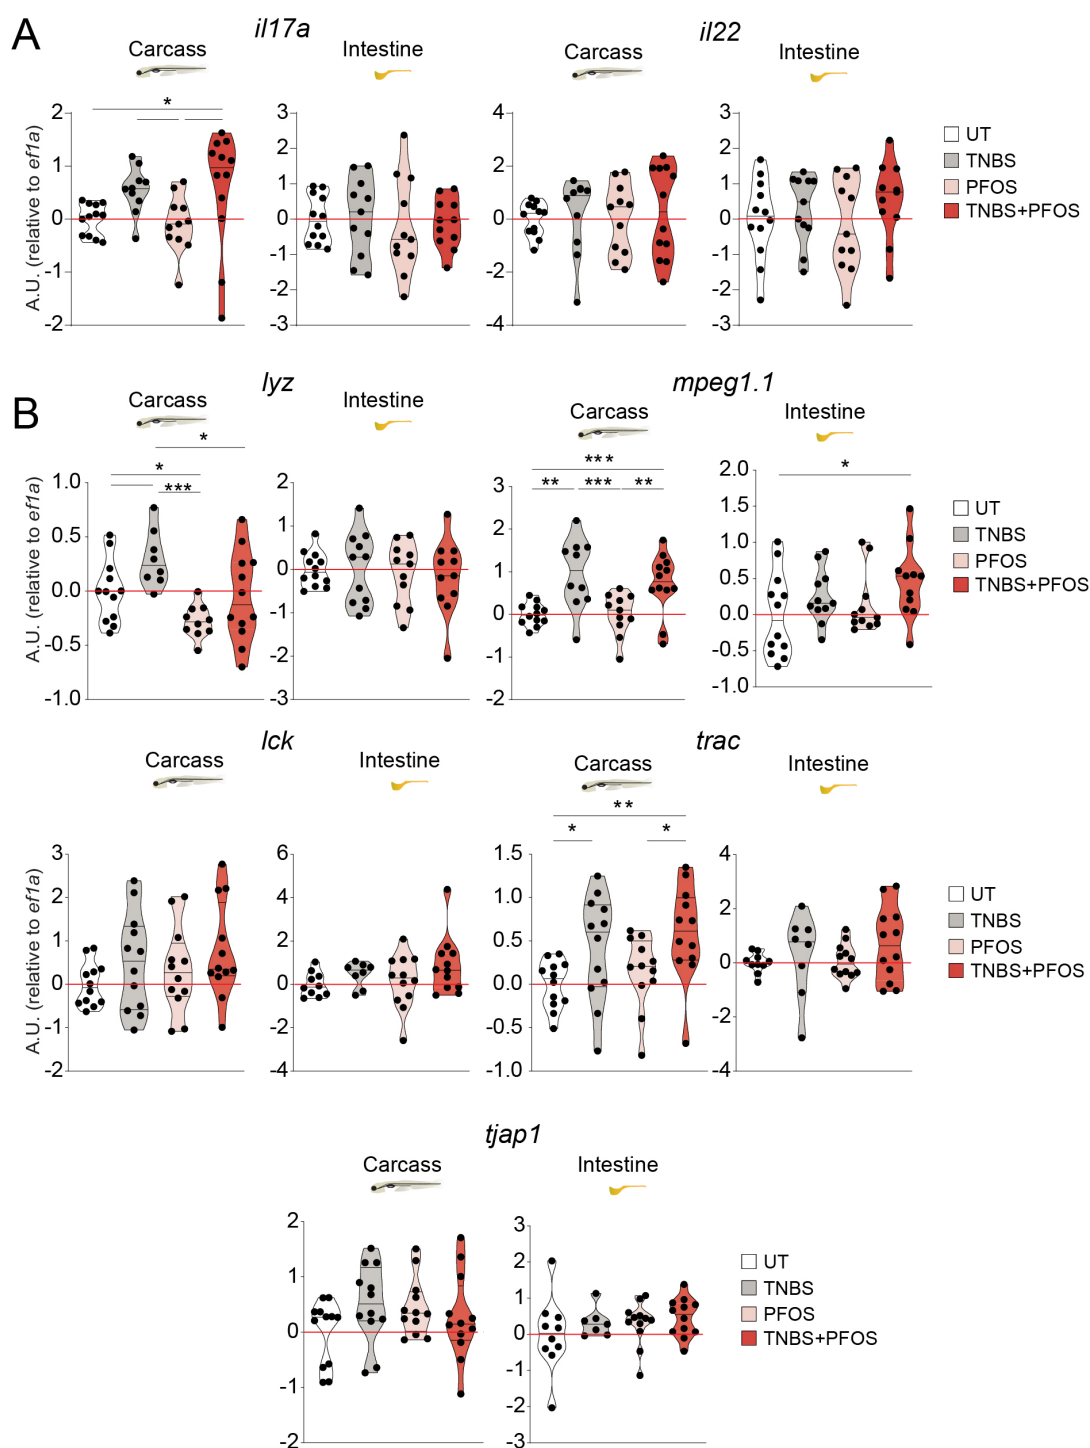

**Fig. S1. PFOS does not alter *il17a* or *il22* expression in zebrafish larvae during TNBS-induced inflammation.** (A-B) Violin plots showing relative expression of *il17a*, *il22*, *lyz*, *mpeg1.1*, *lck*, *trac*, and *tjap1* analyzed by qPCR in dissected intestines or carcasses at 120 hpf following exposure to TNBS (70  $\mu$ g/mL) and PFOS (200 nM). n = 11-12, 4 experiments. Data show transcript levels as A. U. respect to *eef11a1*. The black line represents the median. \* p < 0.05, \*\* p < 0.01, \*\*\* p < 0.001. One-way ANOVA with Fisher's Least Significant Difference (LSD).

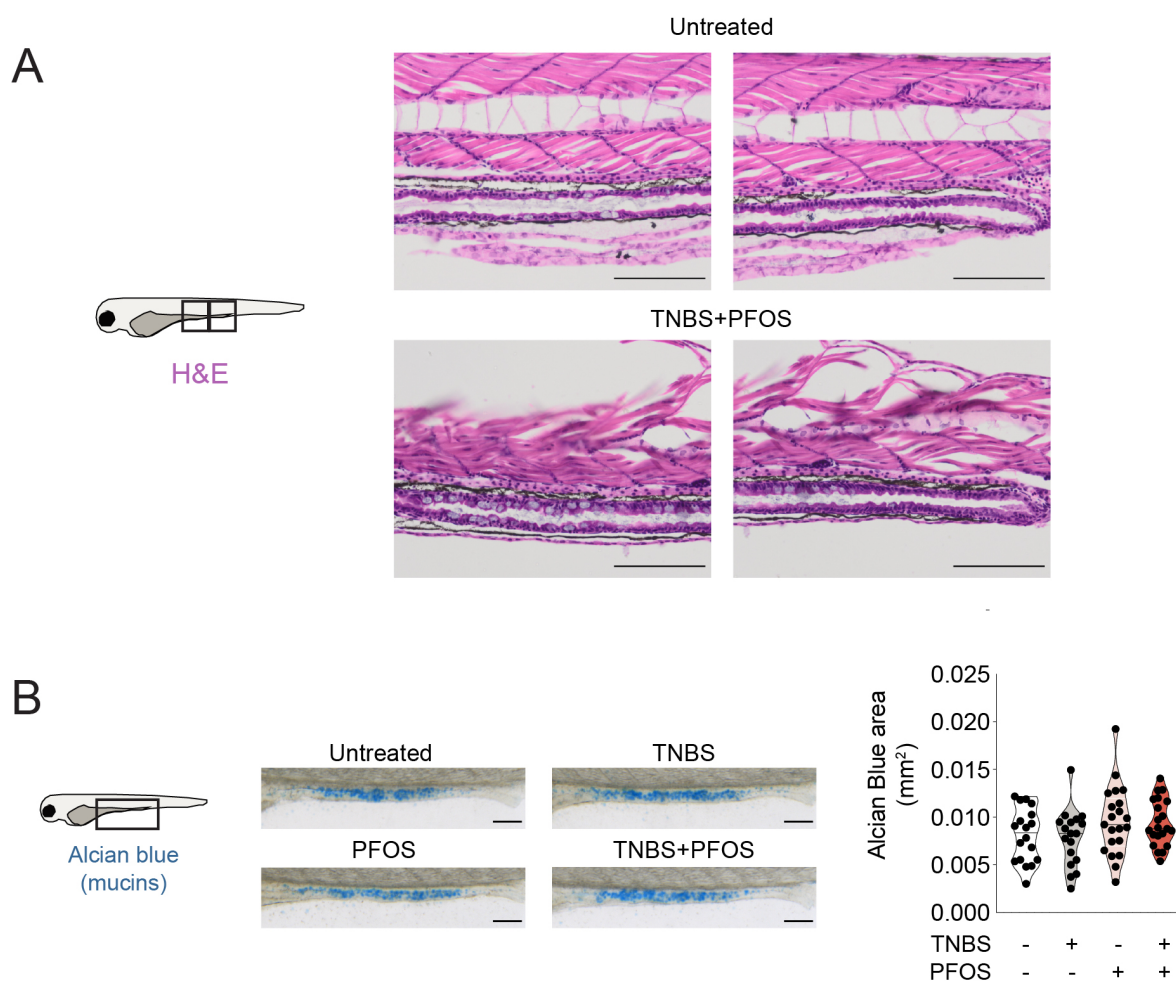

**Fig. S2. PFOS exposure does not alter intestinal epithelial architecture or mucin production.** (A) Representative images of hematoxylin & eosin (H&E) stained 5 days post-fertilization larvae following 48 hours exposure to TNBS (70  $\mu\text{g}/\text{mL}$ ) and PFOS (200 nM). (B) Whole-mount alcian blue staining of zebrafish embryos treated with TNBS+PFOS. The graph represents the quantification of the alcian blue positive area per intestinal area, as described in the cartoon.  $n = 18-21$ , 1 experiment. Each data point represents one 120 h post fertilization zebrafish larvae. The black line represents the median. One-way ANOVA with Fisher's Least Significant Difference (LSD).

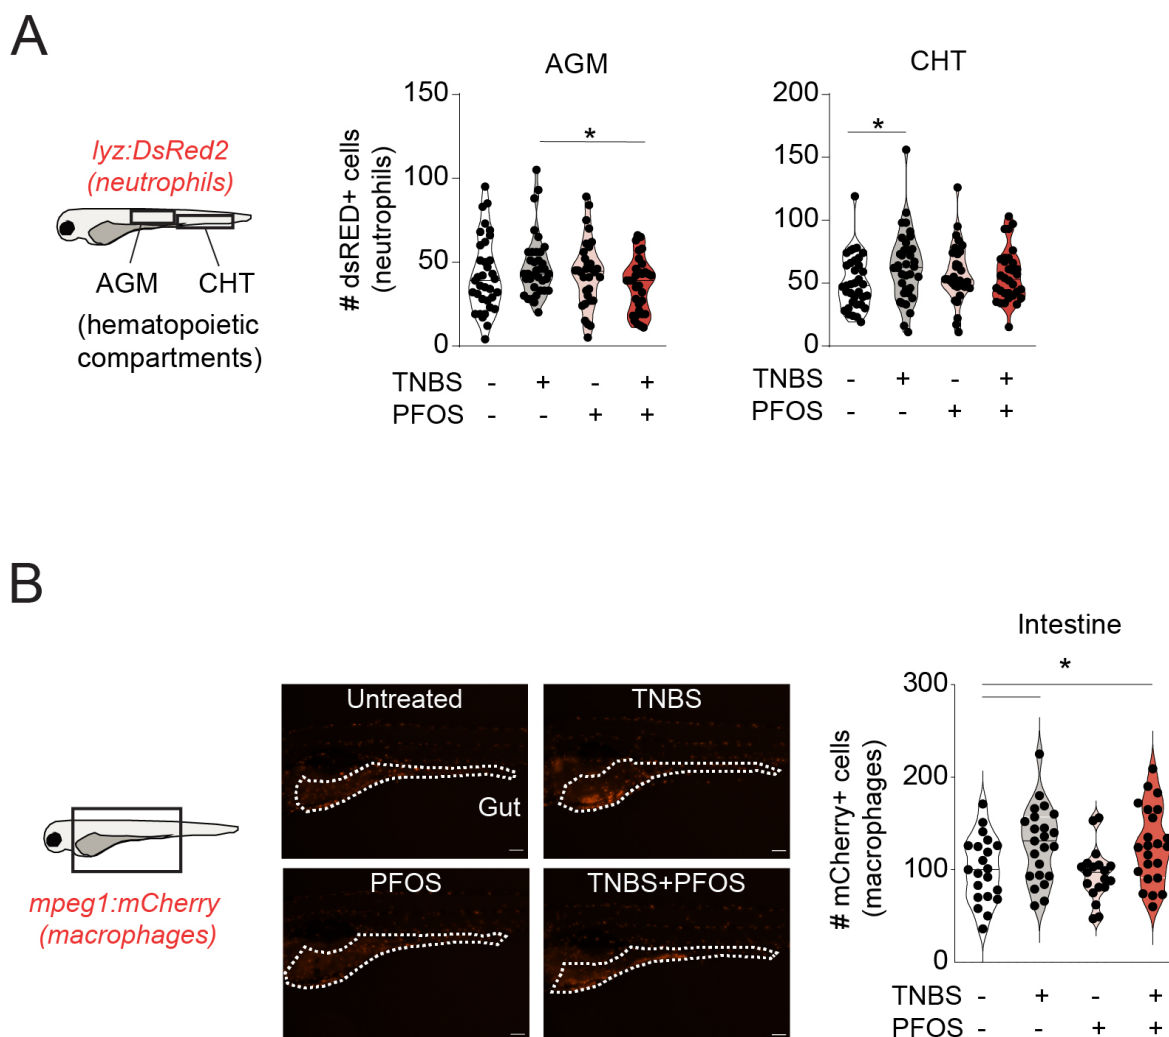

**Fig. S3. PFOS does not alter neutrophils numbers at hematopoietic sites nor macrophages intestinal numbers during TNBS-induced inflammation in zebrafish larvae.** (A) Quantification of DsRed2-positive cells (neutrophils) in the hematopoietic regions (AGM; aorta-gonad-mesonephros, and CHT; caudal hematopoietic tissue) as described in the cartoon.  $n = 32-35$ , 5 experiments. Each data point represents one 120 h post fertilization zebrafish larvae. (B) Quantification of mCherry-positive cells (macrophages) in the gastrointestinal tract of 120 h post fertilization *mpeg1:mCherry-F* larvae. Representative images are 7x magnification. The dash line demarks the gastrointestinal tract area.  $n = 19-23$ , 2 experiments. Each data point represents one 120 h post fertilization zebrafish larvae. The black line represents the median. \*  $p < 0.05$ . One-way ANOVA with Fisher's Least Significant Difference (LSD).

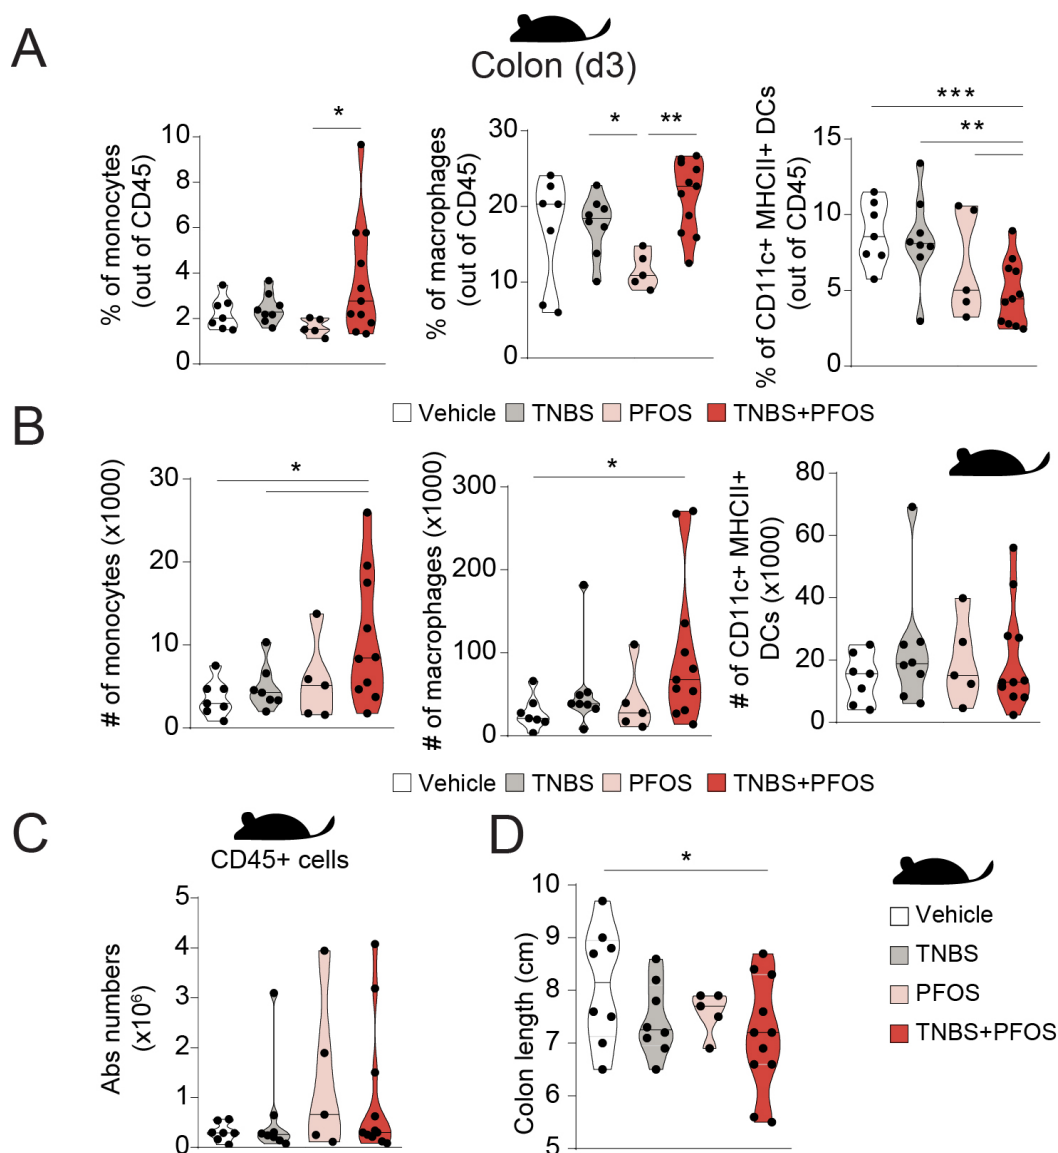

**Fig. S4. Myeloid cell characterization of PFOS exacerbated colitis in the colon.** (A-C) Violin plots showing frequencies out of CD45<sup>+</sup> cells and absolute numbers of myeloid cells in the colon lamina propria, analyzed by flow cytometry. n = 5-11, 3 experiments. (D) Violin plots showing colon length of mice treated with PFOS and TNBS as described in Figure 3D. The black line represents the median. \* p < 0.05, \*\* p < 0.01, \*\*\* p < 0.001. One-way ANOVA with Fisher's Least Significant Difference (LSD) test.

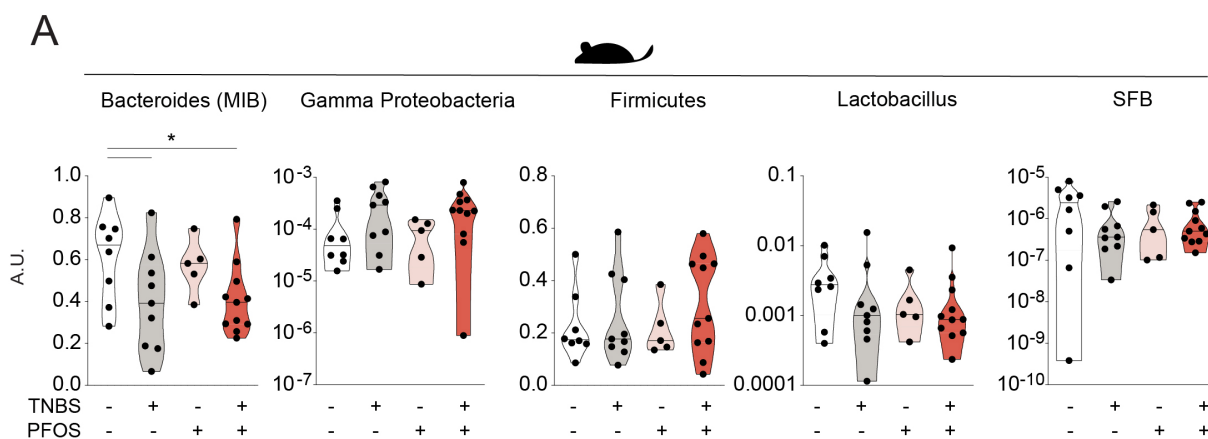

**Fig. S5. PFOS exposure results in reduced abundance of Bacteroides.** (A) Violin plots showing relative abundance of Bacteroides (Mouse Intestinal Bacteroides, MIB), Gamma Proteobacteria, Firmicutes, *Lactobacillus*, and segmented filamentous bacteria (SFB) relative to universal 16S levels analyzed by qPCR. Bacterial DNA was isolated from stool obtained from the colon. n = 5-11, 3 experiments. The black line represents the median. \* p < 0.05. One-way ANOVA with Fisher's Least Significant Difference (LSD) test.

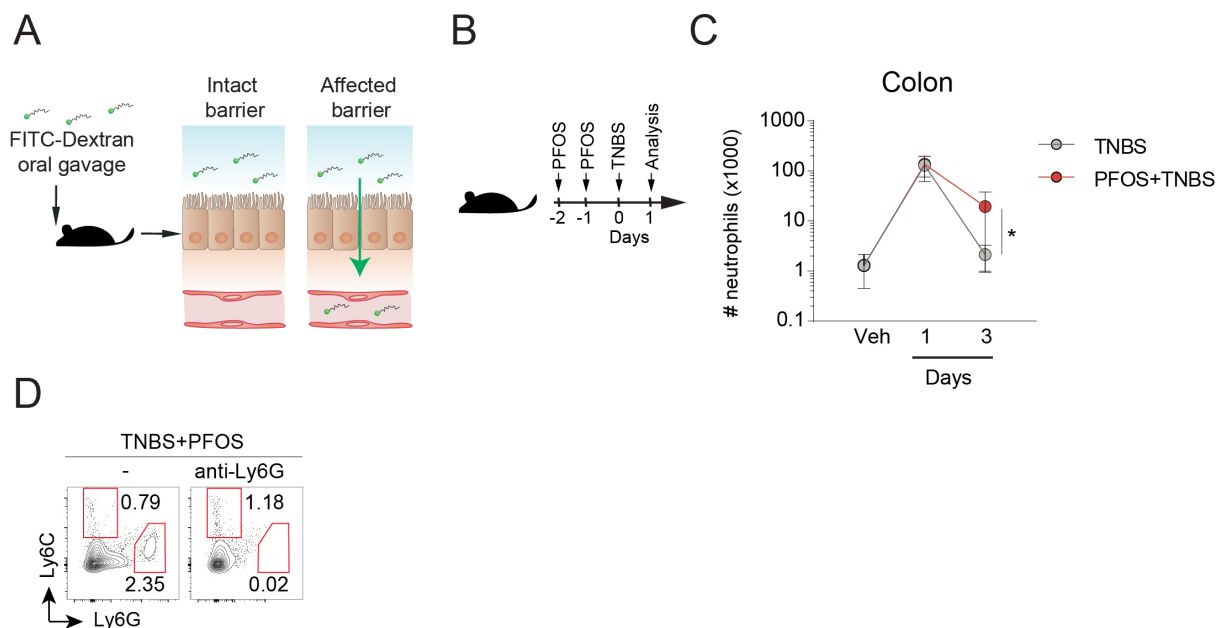

**Fig. S6. PFOS does not alter neutrophil numbers or frequencies in the colon 1 day after TNBS-induced colitis and these are efficiently depleted with anti-Ly6G antibody treatment.** (A) Experimental scheme of the FITC-Dextran permeability assay. (B) Experimental outline. (C) Absolute numbers of neutrophils isolated from the colon lamina propria at day 1 and 3 following TNBS administration.  $n = 7-9$ , 3 experiments for day 1. Data for day 3 corresponds to the data shown in Figure 3F,  $n = 5-11$ , 3 experiments. Veh; vehicle group from the experiment performed at day 1, thus the same values are used for both TNBS and TNBS+PFOS. (D) Representative dot plots of flow cytometry analysis of neutrophils isolated from the colon lamina propria at day 3 following neutrophil depletion in TNBS+PFOS treated mice. Neutrophils are gated as Ly6C<sup>int</sup> and Ly6G<sup>+</sup>. Monocytes are gated as Ly6C<sup>+</sup> and Ly6G<sup>-</sup>. \*  $p < 0.05$ . One-way ANOVA with Fisher's Least Significant Difference (LSD) test.

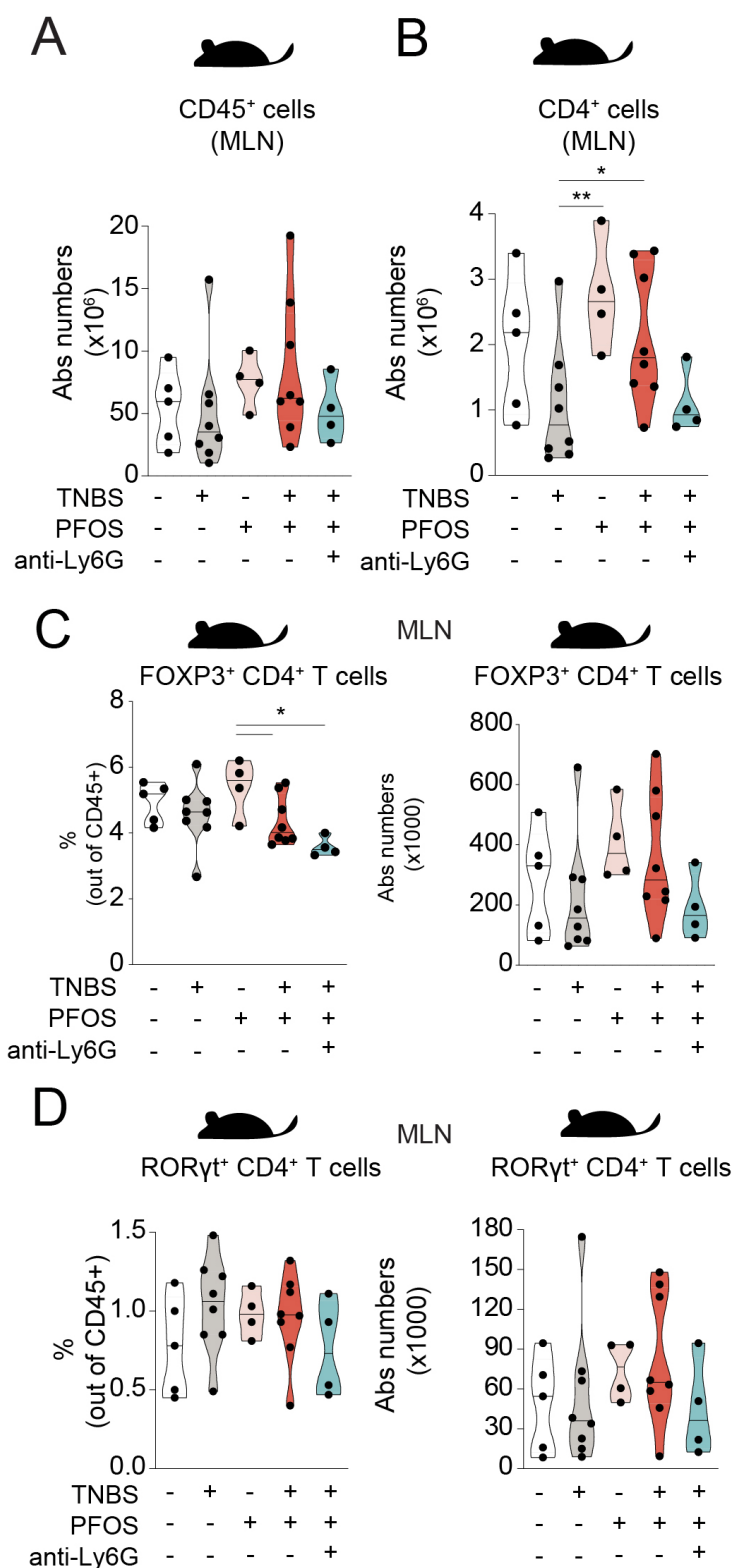

**Fig. S7. PFOS exposure after TNBS-induced colitis results in increased CD4<sup>+</sup> T cells in the MLN.** (A-D) Flow cytometry analysis of MLN FOXP3<sup>+</sup> and RORγt<sup>+</sup> CD4<sup>+</sup> T cells, following TNBS, PFOS and/or neutrophil depletion as in the scheme shown in Figure 5A. Violin plots represent the absolute numbers and frequencies of these populations out of CD45<sup>+</sup> cells. n = 4-8, 4 experiments. The black line represents the median. \* p < 0.05, \*\* p < 0.01, \*\*\* p < 0.001. One-way ANOVA with Fisher's Least Significant Difference (LSD) test.

**Table S1. List of primers used in this study for zebrafish genes**

| <b>Target gene</b> | <b>ENSEMBL accession number</b> | <b>Forward sequence (5' -&gt; 3')</b> | <b>Reverse sequence (5' -&gt; 3')</b> |
|--------------------|---------------------------------|---------------------------------------|---------------------------------------|
| <i>il1b</i>        | ENSDARG00000098700              | ATCAAACCCCAATC<br>CACAGAGT            | GGCACTGAAGACAC<br>CACGTT              |
| <i>tnfa</i>        | ENSDARG0000009511               | GGAGAGTTGCCTTT<br>ACCGCT              | TTGCCCTGGGTCTT<br>ATGGAG              |
| <i>eef1a11</i>     | ENSDARG00000020850              | ACCTACCCTCCTCT<br>TGGTCG              | GGAACGGTGTGATT<br>GAGGGAA             |
| <i>il17a/f3</i>    | ENSDARG00000041976              | CGCCTTGGACATAC<br>ACAACCTT            | AGTAAATGGGTGG<br>GACTCCA              |
| <i>il22</i>        | ENSDARG00000045673              | CGATGACTGATACA<br>GCACGA              | TGTGCTCGTCTGAT<br>TCCAAG              |
| <i>cldn15la</i>    | ENSDARG00000016081              | TGTTTGATCGGCTG<br>GGTTCT              | AGCCTGAATGTGAA<br>CTGGCAA             |
| <i>lyz</i>         | ENSDARG00000114098              | AGCAGTTTAAAGAC<br>CCACCG              | AGCAAGTCTGAACA<br>GGCCAC              |
| <i>mpeg1.1</i>     | ENSDARG00000055290              | ATGTCGTGGCTGGA<br>ACAGAA              | ATGGTTACGGACTT<br>GAACCC              |
| <i>lck</i>         | ENSDARG00000102525              | GCCGAAGAAGATCT<br>CGATGGT             | TCCCCATGTTTACG<br>TATTTTGTCG          |
| <i>trac</i>        | ENSDARG00000104132              | CTGCGAGGAGACAG<br>GCGTTT              | GCCAGAAGATGCC<br>AGTGAC               |
| <i>tjap1</i>       | ENSDARG00000010681              | CTCACCAATAAACT<br>TGTGGACGC           | TGTCGATAGCGTTC<br>GTTTCAGC            |



**Table S2. List of primers used in this study to analyze bacterial abundance**

| <b>Target group</b>                     | <b>Forward sequence (5' -&gt; 3')</b> | <b>Reverse sequence (5' -&gt; 3')</b> |
|-----------------------------------------|---------------------------------------|---------------------------------------|
| Universal 16S rRNA                      | ACTCCTACGGGAGGCAGCAGT                 | ATTACCGCGGCTGCTGGC                    |
| Bacteroides (MIB)                       | CCAGCAGCCGCGGTAATA                    | CGCATTCGCGATACTTCTC                   |
| Gamma Proteobacteria                    | GCTAACGCATTAAGTRYCCG                  | GCCATGCRGCACCTGTCT                    |
| Firmicutes                              | GGAGYATGTGGTTTAATTCGA<br>AGCA         | AGCTGACGACAACCATGCAC                  |
| <i>Lactobacillus</i>                    | AGCAGTAGGGAATCTTCCA                   | CACCGCTACACATGGAG                     |
| Segmented filamentous<br>bacteria (SFB) | GACGCTGAGGCATGAGAGCAT                 | GACGGCACGGATTGTTATTCA                 |
